# Supplementary material for: Truncation and constitutive activation of the androgen receptor by diverse genomic rearrangements in prostate cancer
Source: PubMed Central journal article supplement (PMC5141345; doi:10.1038/ncomms13668), 2016-11-29
Supplement: ncomms13668-s1.pdf [file ncomms13668-s1.pdf]

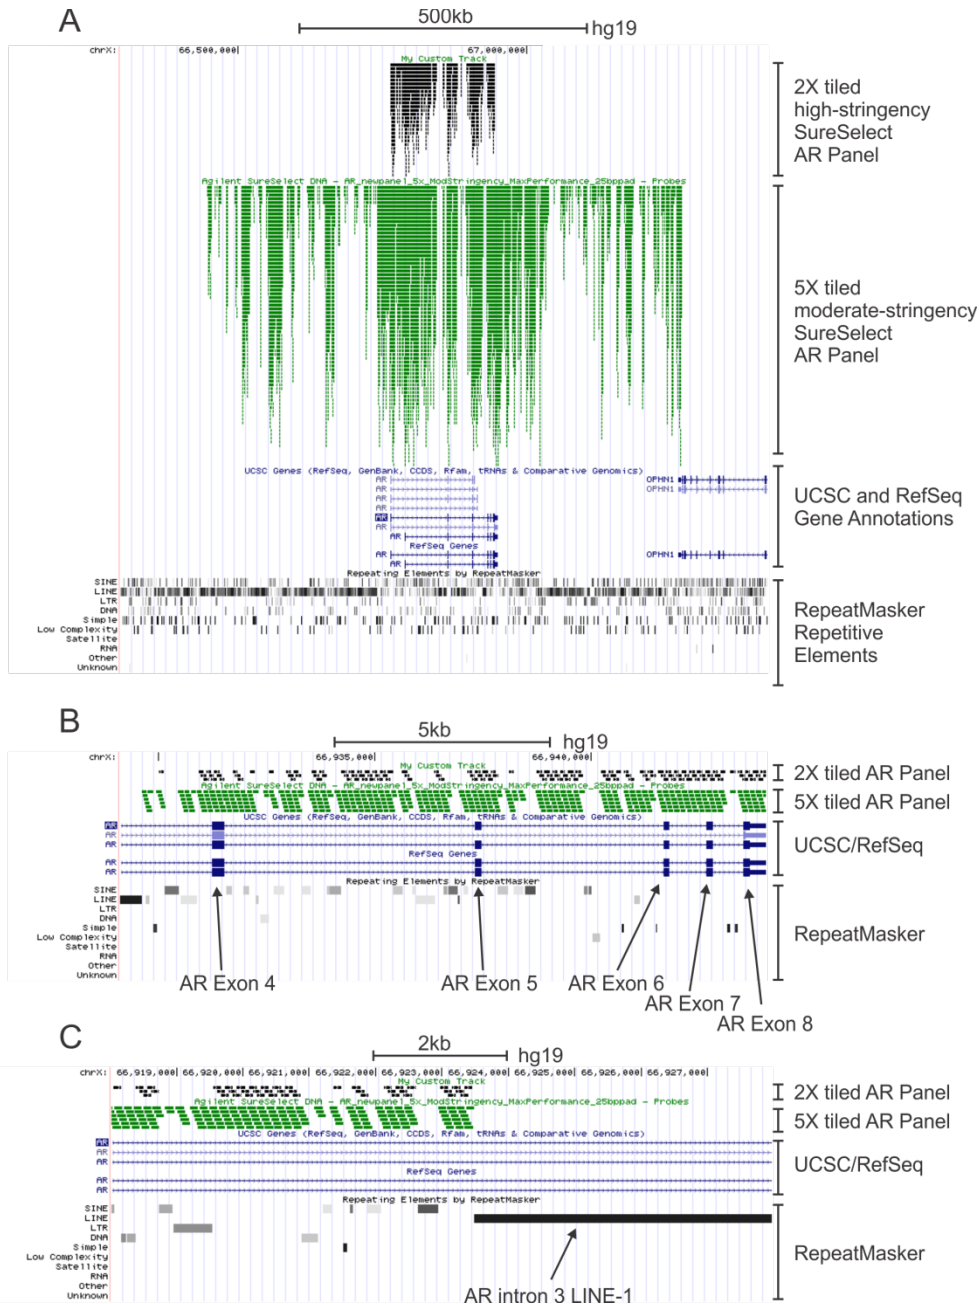

**Supplementary Figure 1. Improvements in Agilent SureSelect AR capture array design.**

Visualization of AR capture libraries in BED format using the UCSC genome browser illustrates key improvements compared with a previous panel used to interrogate structural variants in the AR locus. These improvements are **A**, coverage extending upstream and downstream of the AR gene, **B**, 5X tiling of baits as opposed to 2X tiling, and moderate allowance for repetitive elements identified by RepeatMasker as having low sequence conservation (denoted by lighter gray boxes in the RepeatMasker track). **C**, despite these improvements, the AR capture array is still blind to highly-conserved repetitive elements including a LINE-1 in AR intron 3 (denoted by darker gray and black boxes in the RepeatMasker track).

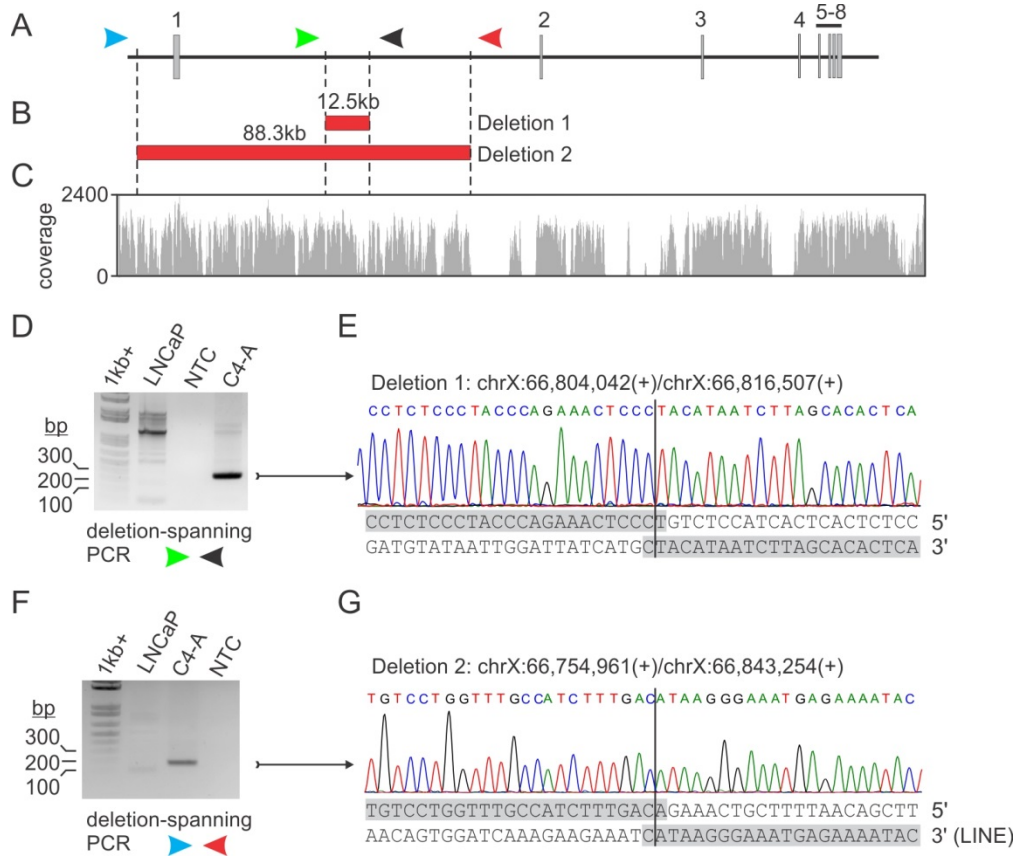

**Supplementary Figure 2. AR genomic structural rearrangement validation in subject C-4.** **A and B**, binding locations of PCR primers (colored arrowheads) for validation of Deletion 1 and Deletion 2 in tumor C-4A. **C**, AR DNA-seq coverage for tumor C-4A was assessed by visualizing BAM files of mapped AR DNA-seq reads in Integrative Genomics Viewer. **D**, PCR was performed with a primer set designed for isolation of Deletion 1 (illustrated in A and B) using DNA from tumor C-4A as well as LNCaP or no template control (NTC) as negative controls. **E**, Sanger sequencing analysis of the tumor C-4A Deletion 1 PCR product. The genomic sequences corresponding to the 5' and 3' breakpoints are indicated, with gray shading representing the sequences contained in the break fusion junction signature. **F**, PCR was performed with a primer set designed for isolation of Deletion 2 (illustrated in A and B) using DNA from tumor C-4A as well as LNCaP or no template control (NTC) as negative controls. **G**, Sanger sequencing analysis of the tumor C-4A Deletion 2 PCR product. The genomic sequences corresponding to the 5' and 3' breakpoints are indicated, with gray shading representing the sequences contained in the break fusion junction signature. The 3' breakpoint from Deletion 2 is located within a LINE-1 element.

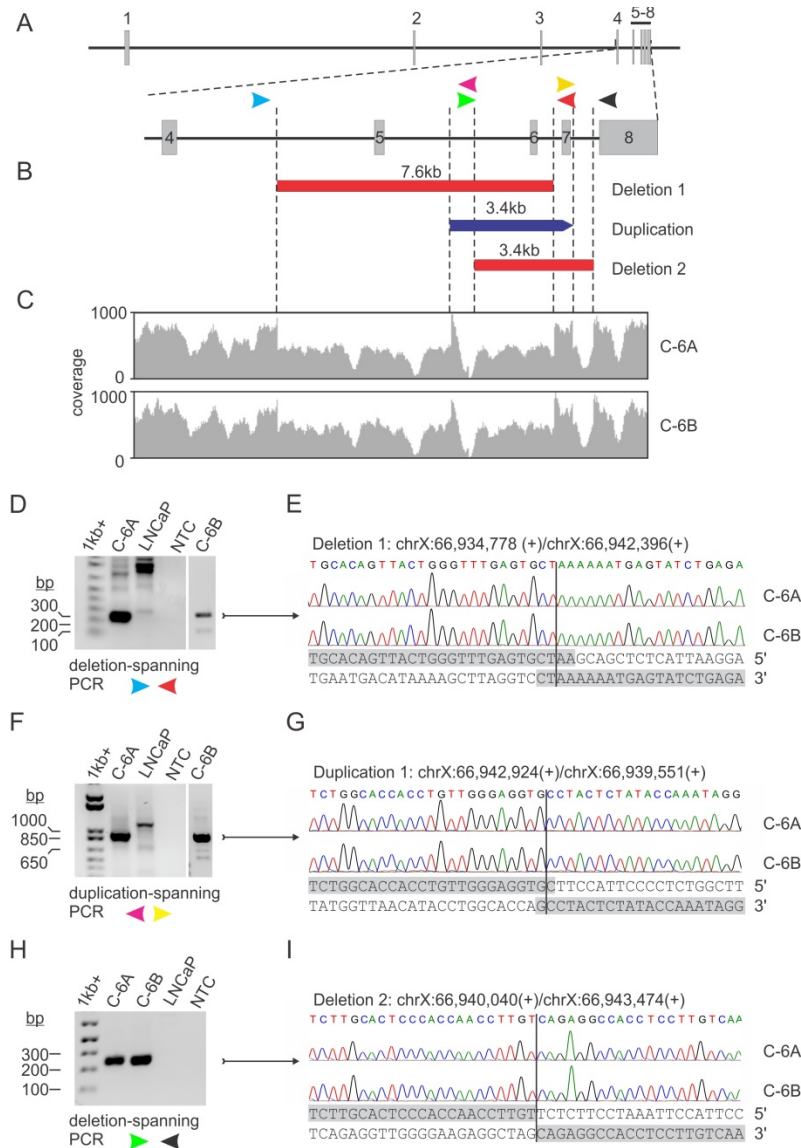

**Supplementary Figure 3. AR genomic structural rearrangement validation in subject C-6.** **A and B**, binding locations of PCR primers (colored arrowheads) for validation of Deletion 1, Duplication, and Deletion 2 in tumors C-6A and C-6B. **C**, AR DNA-seq coverage for tumors C-6A and C-6B was assessed by visualizing BAM files of mapped AR DNA-seq reads in Integrative Genomics Viewer. **D**, PCR was performed with a primer set designed for isolation of Deletion 1 (illustrated in A and B) using DNA from tumors C-6A and C-6B as well as LNCaP or no template control (NTC) as negative controls. **E**, Sanger sequencing analysis of the tumor C-6A and C-6B Deletion 1 PCR products. The genomic sequences corresponding to the 5' and 3' breakpoints are indicated, with gray shading representing the sequences contained in the break fusion junction signature. **F**, PCR was performed with a primer set designed for isolation of the Duplication (illustrated in A and B) using DNA from tumors C-6A and C-6B as well as LNCaP or no template control (NTC) as negative controls. **G**, Sanger sequencing analysis of the tumor C-6A and C-6B Duplication PCR products. The genomic sequences corresponding to the 5' and 3' breakpoints are indicated, with gray shading representing the sequences contained in the break fusion junction signature. **H**, PCR was performed with a primer set designed for isolation of Deletion 2 (illustrated in A and B) using DNA from tumors C-6A and C-6B as well as LNCaP or no template control (NTC) as negative controls. **I**, Sanger sequencing analysis of the tumor C-6A and C-6B Deletion 2 PCR products. The genomic sequences corresponding to the 5' and 3' breakpoints are indicated, with gray shading representing the sequences contained in the break fusion junction signature.

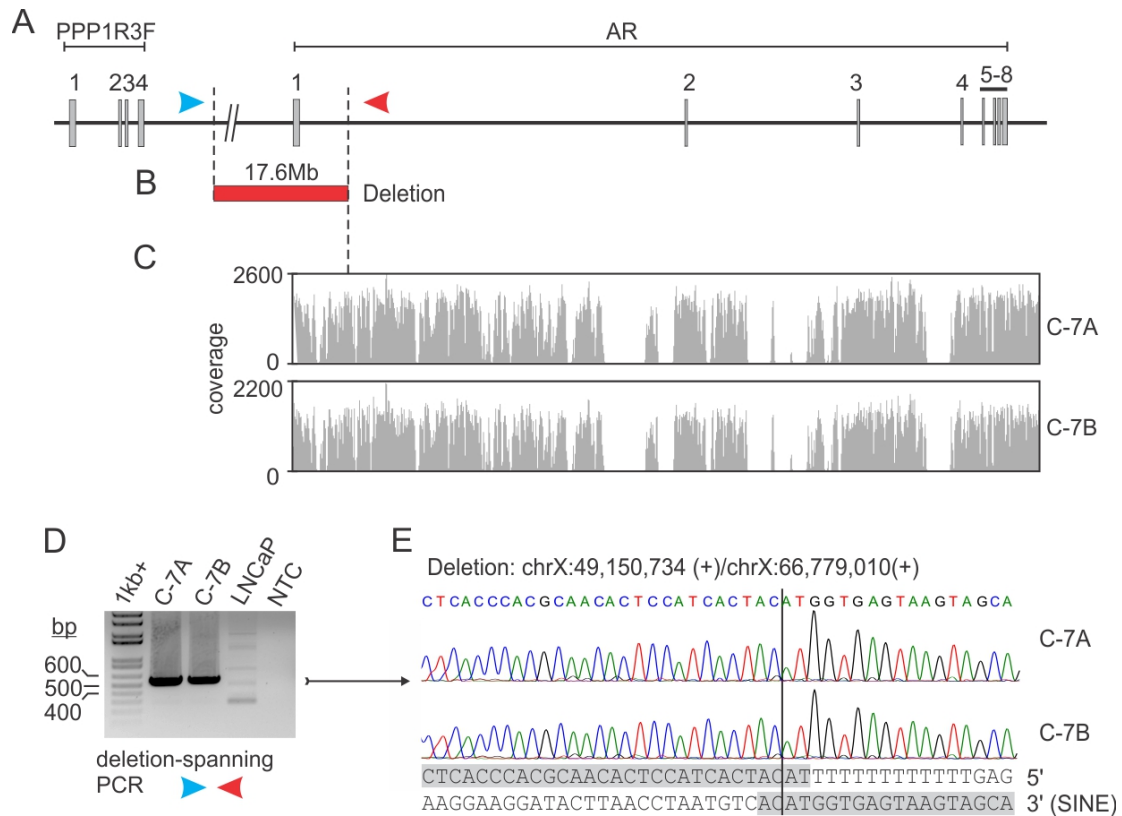

**Supplementary Figure 4. AR genomic structural rearrangement validation in subject C-7.** **A and B**, binding locations of PCR primers (colored arrowheads) for validation of the Deletion in tumors C-7A and C-7B. **C**, AR DNA-seq coverage for tumors C-7A and C-7B was assessed by visualizing BAM files of mapped AR DNA-seq reads in Integrative Genomics Viewer. **D**, PCR was performed with a primer set designed for isolation of the Deletion (illustrated in A and B) using DNA from tumors C-7A and C-7B as well as LNCaP or no template control (NTC) as negative controls. **E**, Sanger sequencing analysis of the Deletion PCR products from tumors C-7A and C-7B. The genomic sequences corresponding to the 5' and 3' breakpoints are indicated, with gray shading representing the sequences contained in the break fusion junction signature. The 3' breakpoint sequence is located within a SINE element.

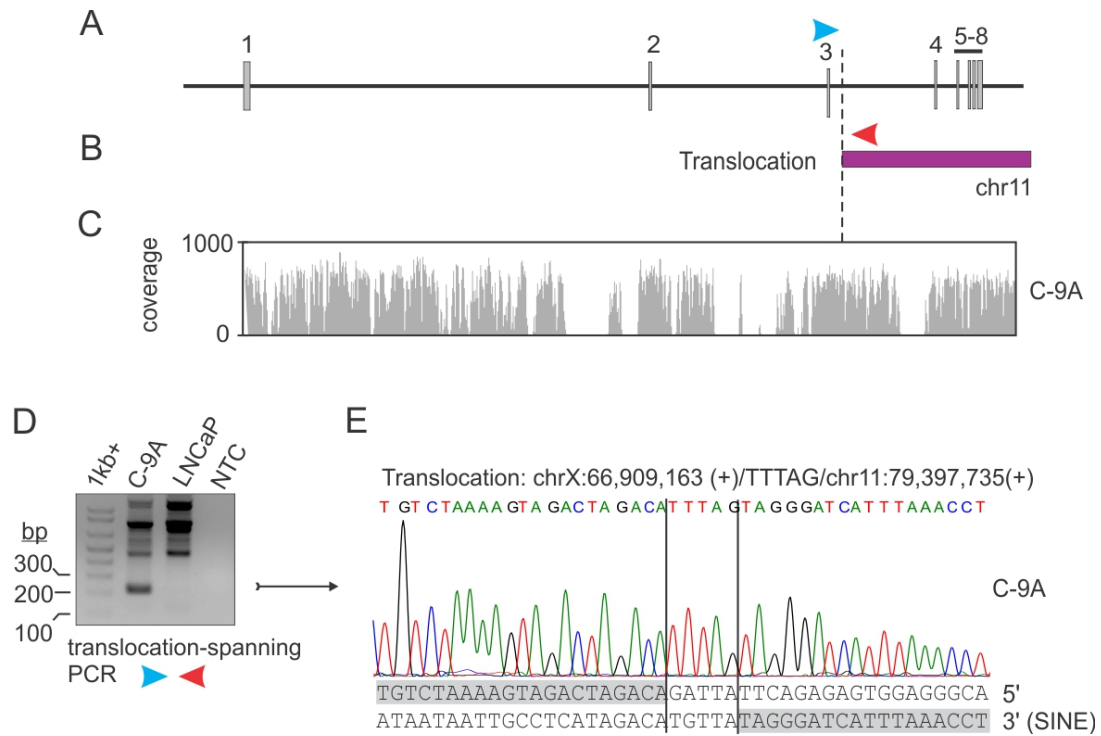

**Supplementary Figure 5. AR genomic structural rearrangement validation in subject C-9.** **A and B,** binding locations of PCR primers (colored arrowheads) for validation of the Translocation in tumor C-9A. **C,** AR DNA-seq coverage for tumor C9-A was assessed by visualizing BAM files of mapped AR DNA-seq reads in Integrative Genomics Viewer. **D,** PCR was performed with a primer set designed for isolation of the Translocation (illustrated in A and B) using DNA from tumor C9-A as well as LNCaP or no template control (NTC) as negative controls. **E,** Sanger sequencing analysis of the Translocation PCR product from tumor C9-A. The genomic sequences corresponding to the 5' and 3' breakpoints are indicated, with gray shading representing the sequences contained in the break fusion junction signature. The 3' breakpoint sequence is located within a SINE element.

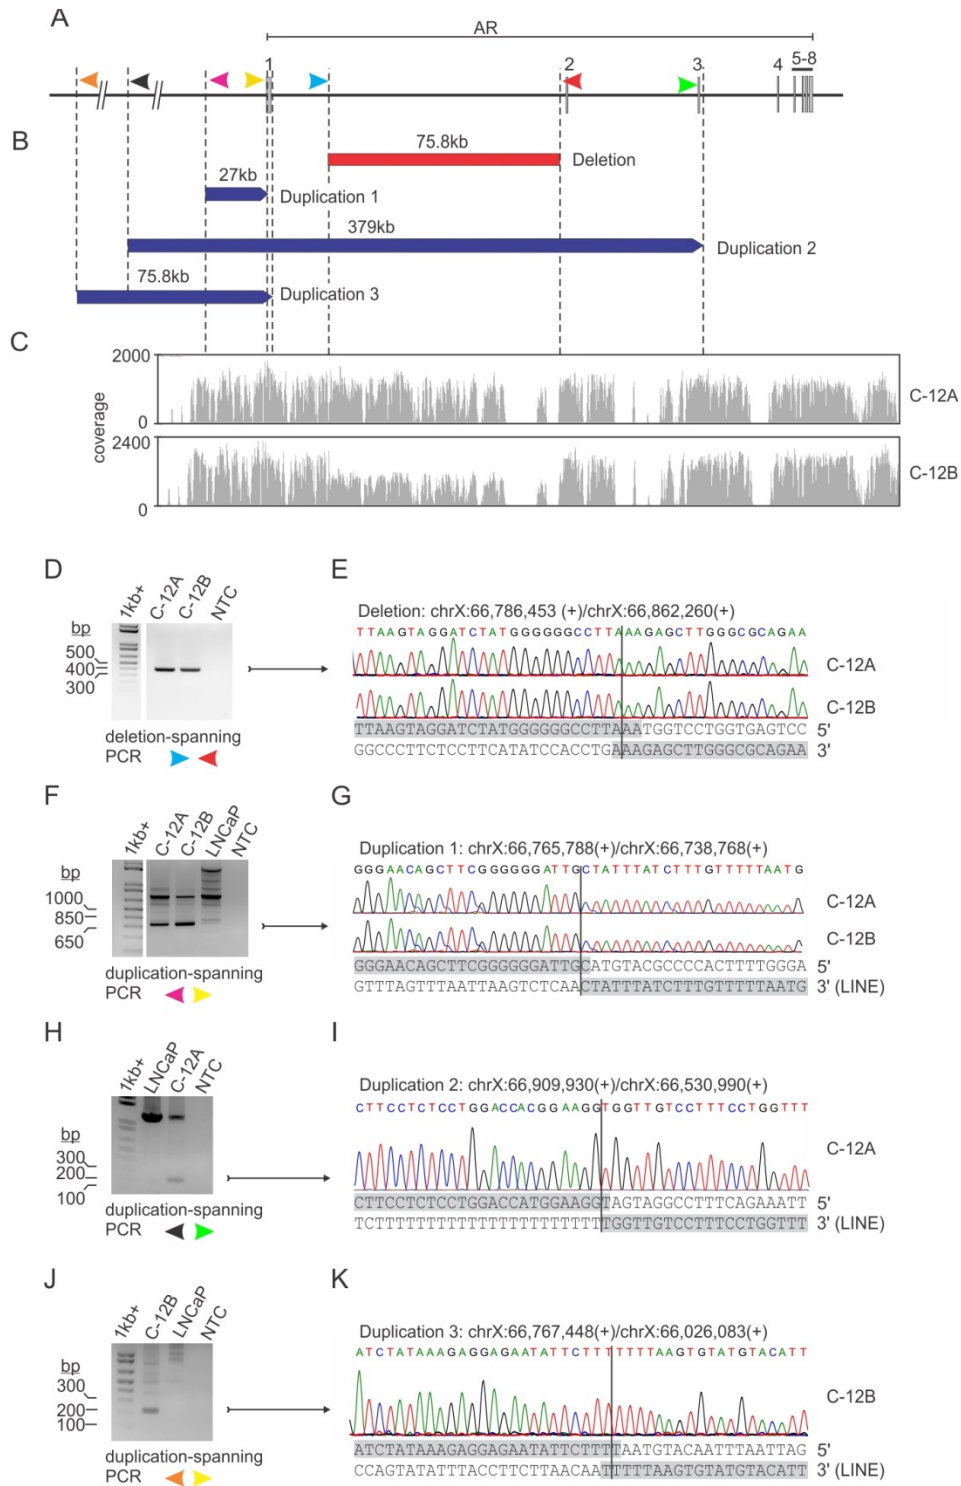

**Supplementary Figure 6. AR genomic structural rearrangement validation in subject C-12. A and B, binding locations of PCR primers (colored arrowheads) for validation of the Deletion and Duplications 1, 2, and 3 in tumors C-12A and C-12B. C, AR DNA-seq coverage for tumors C-12A and C-12B was assessed by visualizing BAM files of mapped AR DNA-seq reads in Integrative Genomics Viewer. D, PCR was performed with a primer set designed for isolation of the Deletion (illustrated in A and B) using DNA from tumors C-12A and C-12B as well as no template control (NTC) as negative control.**



**Supplementary Figure 6 legend, continued.**

**E**, Sanger sequencing analysis of the tumor C-12A and C-12B Deletion PCR products. The genomic sequences corresponding to the 5' and 3' breakpoints are indicated, with gray shading representing the sequences contained in the break fusion junction signature. **F**, PCR was performed with a primer set designed for isolation of Duplication 1 (illustrated in A and B) using DNA from tumors C-12A and C-12B as well as LNCaP or no template control (NTC) as negative controls. **G**, Sanger sequencing analysis of the tumor C-12A and C-12B Duplication 1 PCR products. The genomic sequences corresponding to the 5' and 3' breakpoints are indicated, with gray shading representing the sequences contained in the break fusion junction signature. The 3' breakpoint sequence is located in a LINE-1 element. **H**, PCR was performed with a primer set designed for isolation of Duplication 2 (illustrated in A and B) using DNA from tumor C-12A as well as LNCaP or no template control (NTC) as negative controls. **I**, Sanger sequencing analysis of the tumor C-12A Duplication 2 PCR product. The genomic sequences corresponding to the 5' and 3' breakpoints are indicated, with gray shading representing the sequences contained in the break fusion junction signature. The 3' breakpoint sequence is located in a LINE-1 element. **J**, PCR was performed with a primer set designed for isolation of Duplication 3 (illustrated in A and B) using DNA from tumor C-12A as well as LNCaP or no template control (NTC) as negative controls. **K**, Sanger sequencing analysis of the tumor C-12B Duplication 3 PCR product. The genomic sequences corresponding to the 5' and 3' breakpoints are indicated, with gray shading representing the sequences contained in the break fusion junction signature. The 3' breakpoint sequence is located in a LINE-1 element.

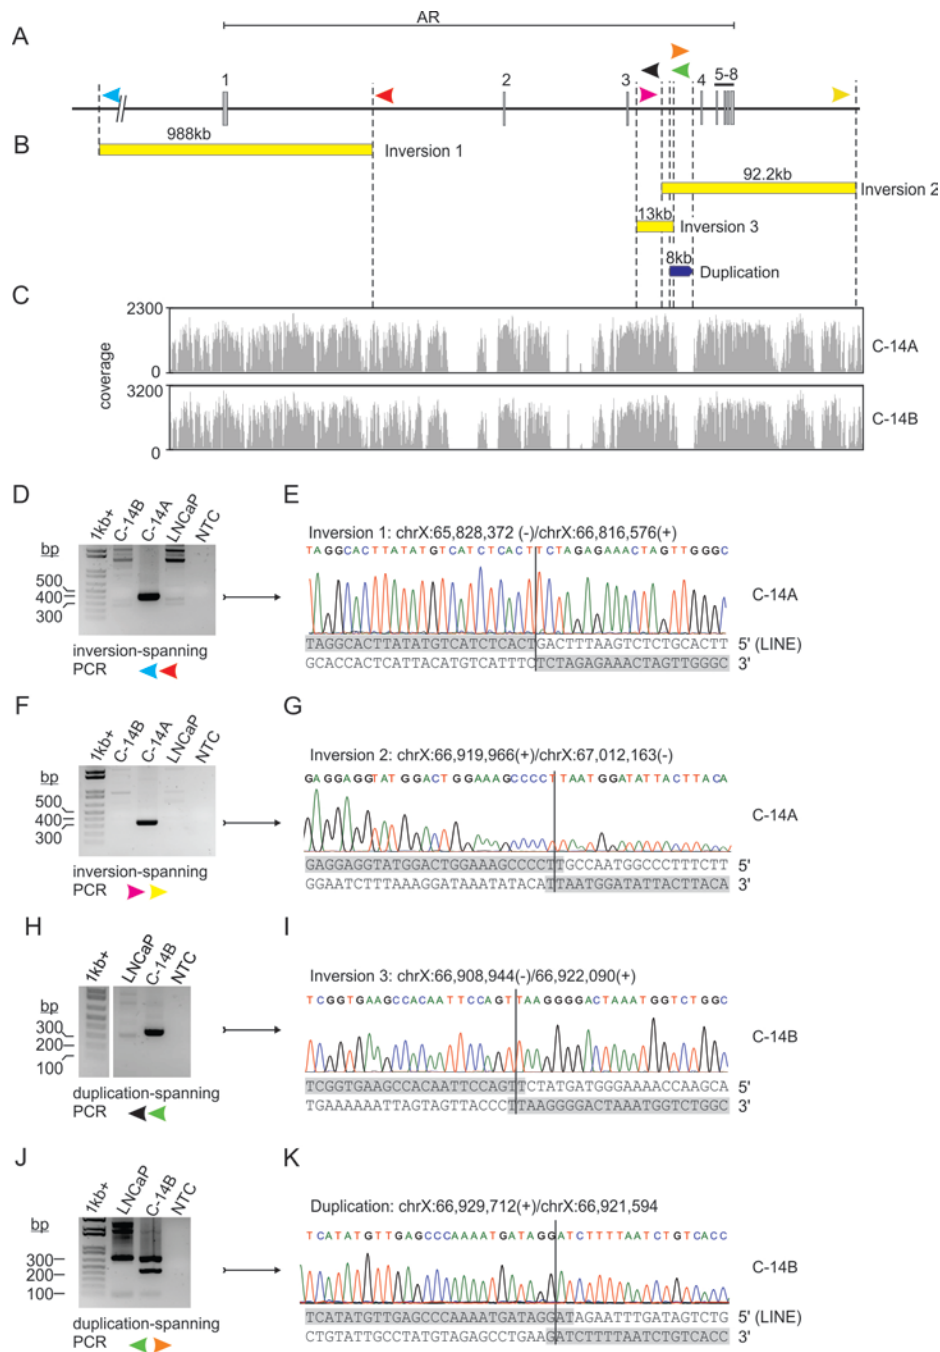

**Supplementary Figure 7. AR genomic structural rearrangement validation in subject C-14.** **A** and **B**, binding locations of PCR primers (colored arrowheads) for validation of Inversions 1, 2, and 3, and the Duplication in tumors C-14A and C-14B. **C**, AR DNA-seq coverage for tumors C-14A and C-14B was assessed by visualizing BAM files of mapped AR DNA-seq reads in Integrative Genomics Viewer. **D**, PCR was performed with a primer set designed for isolation of Inversion 1 (illustrated in **A** and **B**) using DNA from tumors C-14A and C-14B as well as LNCaP DNA and no template control (NTC) as negative controls. **E**, Sanger sequencing analysis of the tumor C-14A Inversion 1 PCR product. The genomic sequences corresponding to the 5' and 3' breakpoints are indicated, with gray shading representing the sequences contained in the break fusion junction signature. The 5' breakpoint sequence is located in a LINE-1 element **F**, PCR was performed with a primer set designed for isolation of Inversion 2



**Supplementary Figure 7 legend, continued.**

(illustrated in A and B) using DNA from tumors C-14A and C-14B as well as LNCaP or no template control (NTC) as negative controls. **G**, Sanger sequencing analysis of the tumor C-14A Inversion 1 PCR product. The genomic sequences corresponding to the 5' and 3' breakpoints are indicated, with gray shading representing the sequences contained in the break fusion junction signature. **H**, PCR was performed with a primer set designed for isolation of Inversion 3 (illustrated in A and B) using DNA from tumor C-14B as well as LNCaP or no template control (NTC) as negative controls. **I**, Sanger sequencing analysis of the tumor C-14B Inversion 3 PCR product. The genomic sequences corresponding to the 5' and 3' breakpoints are indicated, with gray shading representing the sequences contained in the break fusion junction signature. **J**, PCR was performed with a primer set designed for isolation of the Duplication (illustrated in A and B) using DNA from tumor C-14B as well as LNCaP or no template control (NTC) as negative controls. **K**, Sanger sequencing analysis of the tumor C-14B Duplication PCR product. The genomic sequences corresponding to the 5' and 3' breakpoints are indicated, with gray shading representing the sequences contained in the break fusion junction signature. The 5' breakpoint sequence is located in a LINE-1 element.

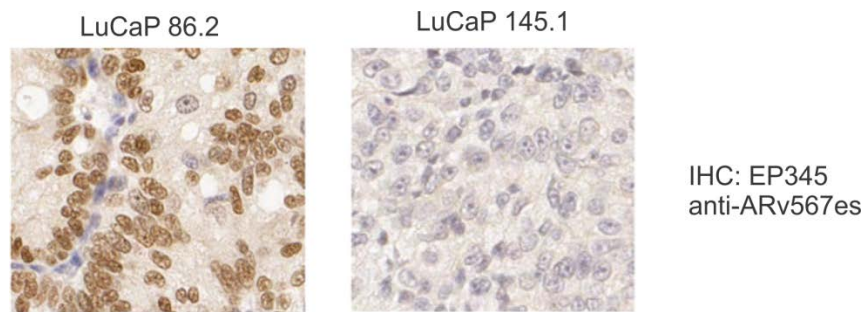

**Supplementary Figure 8. Immunohistochemistry with ARv567es rabbit monoclonal antibody EP345.** Xenograft tissues positive (LuCaP 86.2) or negative (LuCaP 145.1) for ARv567es were subjected to IHC with EP345.

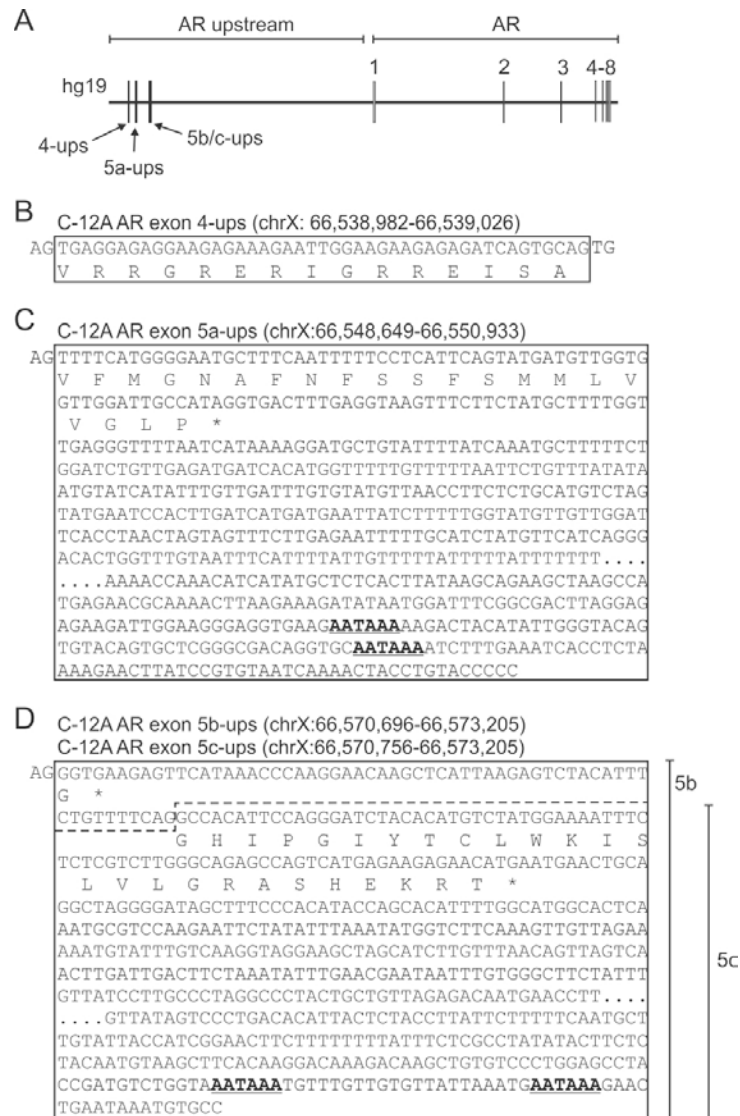

**Supplementary Figure 9. Exons expressed in the context of AR-Vs in tumor C-12A.** **A**, location of AR exons 4-ups, 5a-ups, and 5b/c-ups in the context of the non-rearranged hg19 reference genome architecture. Exon nomenclature utilizes numbering/lettering to reflect position in the AR transcript and “ups” to reflect the genomic location upstream of AR. **B**, genomic sequence of AR exon 4-ups with canonical flanking intronic AG/TG dinucleotides. Translation in the context of the reading frame of the expressed AR-V is indicated. **C**, genome sequence of 3’ terminal exon 5a-ups with a canonical upstream intronic AG dinucleotide. Translation in the context of the reading frame of the expressed AR-V is indicated. Canonical polyadenylation signals (AATAAA) located upstream of RNA-seq coverage drop-off are underlined and bold. **D**, genome sequences of 3’ terminal AR exons 5b- or 5c-ups with the two splice acceptor sites containing canonical upstream intronic AG dinucleotides. Two possible translation reading frames for expressed AR-Vs are indicated based upon usage of the exon 5b or 5c splice acceptor site. Canonical polyadenylation signals (AATAAA) located upstream of RNA-seq coverage drop-off are underlined and bold.

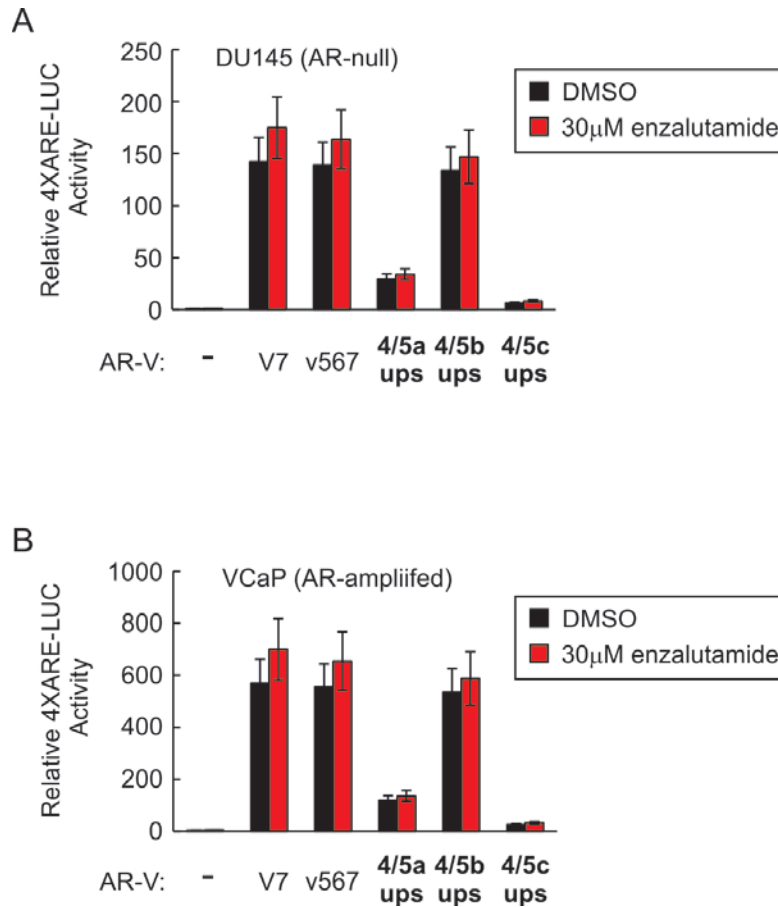

**Supplementary Figure 10. Luciferase assays in DU145 and VCaP cells with AR-Vs specific to tumor C-12A.** **A and B**, AR-null DU145 prostate cancer cells (A) and AR amplified VCaP prostate cancer cells (B) were transfected with an androgen response element (ARE)-driven luciferase reporter and expression vectors encoding AR-Vs as indicated. AR-Vs encoded by splicing of novel AR upstream exons from tumor C-12A are indicated in bold. Cells were treated with 30µM enzalutamide (enz) as, or DMSO (vehicle control) as indicated and subjected luciferase assay. Data represent mean +/- S.E. from three biological replicate experiments, each performed in duplicate (n = 6).

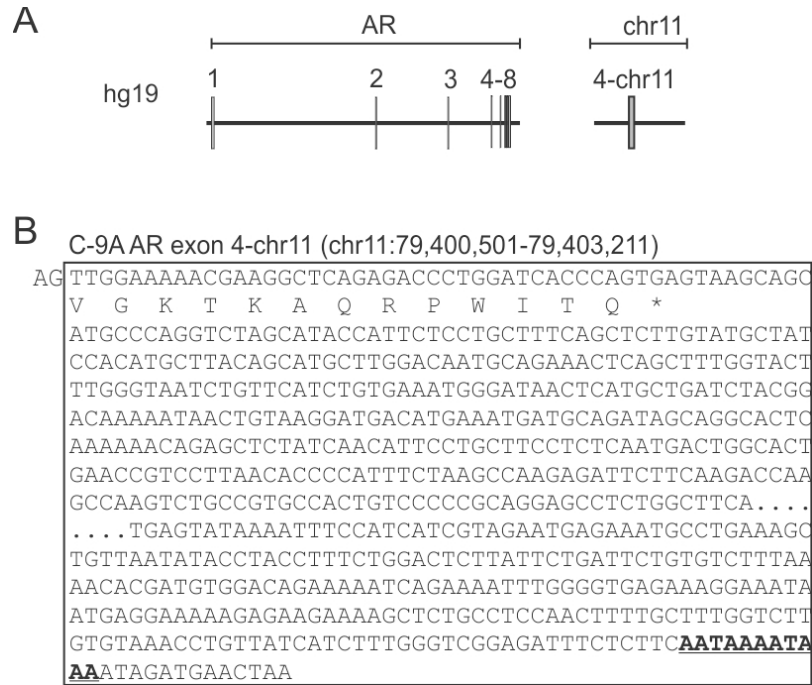

**Supplementary Figure 11. An exon located in chromosome 11 expressed in the context of an AR-V in tumor C-9A.** **A**, location of AR exon 4-chr11 in the context of the non-rearranged hg19 reference genome architecture. Exon nomenclature utilizes numbering to reflect position in the AR transcript and “chr11” to reflect the genomic origin being chromosome 11. **B**, genomic sequence of AR exon 4-chr11 with a canonical upstream intronic AG dinucleotide. Translation in the context of the reading frame of the expressed AR-V is indicated. Canonical polyadenylation signals (AATAAA) located upstream of RNA-seq coverage drop-off are underlined and bold.

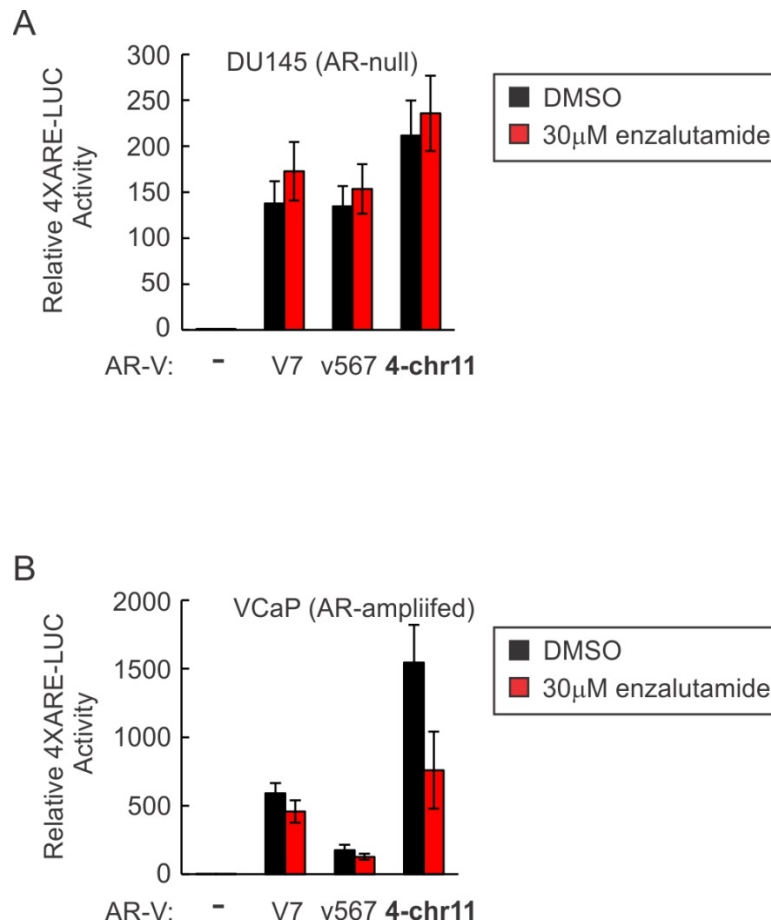

**Supplementary Figure 12. Luciferase assays in DU145 and VCaP cells with AR-Vs specific to tumor C-9A.** **A and B**, AR-null DU145 prostate cancer cells (A) and AR amplified VCaP prostate cancer cells (B) were transfected with an androgen response element (ARE)-driven luciferase reporter and expression vectors encoding AR-Vs as indicated. An AR-V encoded by splicing of a novel 3' terminal exon on chromosome 11 in tumor C-9A is indicated in bold. Cells were treated with 30µM enzalutamide (enz) as, or DMSO (vehicle control) as indicated and subjected luciferase assay. Data represent mean +/- S.E. from three biological replicate experiments, each performed in duplicate (n = 6).



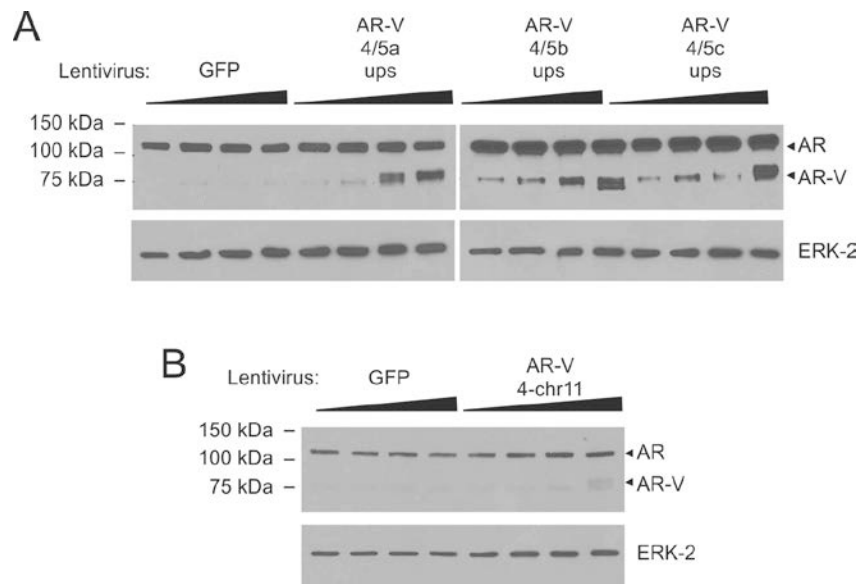

**Supplementary Figure 13. AR and ERK-2 western blots of lentivirus-infected LNCaP cells. A,** LNCaP cells were infected with a range of titers of lentivirus encoding GFP (control) or AR-Vs from tumor C-12A and subjected to western blot with antibodies specific for the AR NTD and ERK-2. **B,** LNCaP cells were infected with a range of titers of lentivirus encoding GFP (control) or the AR-V from tumor C-9A and subjected to western blot with antibodies specific for the AR NTD and ERK-2.

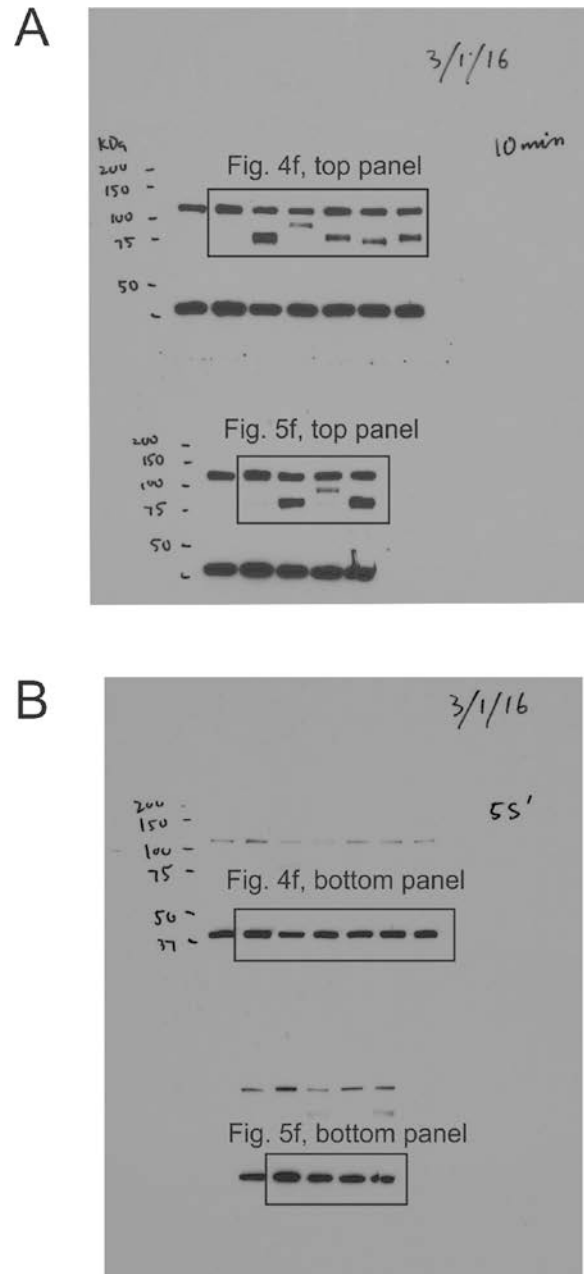

**Supplementary Figure 14. Full (uncropped) blots from Figs. 4 and 5. A,** Uncropped western blots probed simultaneously with antibodies specific for the AR NTD and ERK-2 and exposed to film for 10 minutes. The areas cropped for display in Figs. 4f and 5f are indicated. **B,** Uncropped western blots processed as in (A) and exposed to film for 5 seconds. The area cropped for display in Figs. 4f and 5f are indicated.

**Supplementary Table 1:** Features of New Agilent SureSelect AR Capture Panel

| <b>Feature</b>                            | <b>2X Tiled High-Stringency Panel (old)</b> | <b>5X Tiled Mod-Stringency Panel (new)</b> |
|-------------------------------------------|---------------------------------------------|--------------------------------------------|
| Total Probes                              | 1381                                        | 16468                                      |
| Probes Overlapping AR                     | 1357                                        | 4623                                       |
| AR Bases Covered by Probes                | 90389                                       | 128137                                     |
| % AR Bases Covered by Probes              | 48.40%                                      | 68.70%                                     |
| Uniquely covered AR Bases vs. Other Panel | 82                                          | 37830                                      |

**Supplementary Table 2: CPRC Tissue Metastatic Locations**

| <b>Sample</b> | <b>Tumor Location</b>             | <b>% Cancer in Adjacent Tissue Section</b> |
|---------------|-----------------------------------|--------------------------------------------|
| C-1A          | liver met                         | 60                                         |
| C-1B          | lymph node met                    | 90                                         |
| C-2A          | lymph node met                    | 80                                         |
| C-2B          | mesentery lymph node met #1       | 80                                         |
| C-3A          | mesenteric lymph node met         | 95                                         |
| C-3B          | pretrachial lymph node met        | 99                                         |
| C-4A          | right iliac lymph node met        | 95                                         |
| C-4B          | peri bile duct lymph node met     | 70                                         |
| C-5A          | lymph node met                    | 95                                         |
| C-5B          | iliac lymph node met              | 80                                         |
| C-6A          | supra kidney LN met               | 90                                         |
| C-6B          | para aortic LN met                | 90                                         |
| C-7A          | pre aortic lymph node met #2      | 90                                         |
| C-7B          | pre aortic lymph node met #3      | 95                                         |
| C-8A          | peri aortic lymph node met        | 100                                        |
| C-8B          | lung met                          | 95                                         |
| C-9A          | left periaortic lymph node met    | 80                                         |
| C-9B          | aortic bifurcation lymph node     | 90                                         |
| C-10A         | aortic lymph node met             | 80                                         |
| C-10B         | left adrenal met                  | 70                                         |
| C-11A         | right diaphragm met               | 95                                         |
| C-11B         | right iliac lymph node            | 85                                         |
| C-12A         | liver met 1                       | 70                                         |
| C-12B         | liver met 2                       | 90                                         |
| C-13A         | peri aortic lymph node met        | 30                                         |
| C-13B         | bladder met                       | 100                                        |
| C-14A         | right iliac pelvic lymph node met | 90                                         |
| C-14B         | liver met                         | 80                                         |
| C-15A         | abdominal lymph node met 2        | 70                                         |
| C-15B         | left peri aortic lymph node met   | 80                                         |

**Supplementary Table 3: Clinical Data for Rapid Autopsy Subjects**

| Rapid Autopsy Subject # | Gleason | PSA at Diagnosis | Age at Diagnosis | Age at Death (years) | Survival from Diagnosis (years) | Prostatectomy | Androgen Deprivation Therapy | Androgen Deprivation Therapy (Type)                         | Androgen Independence (years) | Androgen Ablation to Death (years) | First Bone Metastasis Age (years) | Bone Metastasis Delay from Diagnosis (years) | Survival from First Bone Metastasis (years) | Duration Ketoconazole (months) |
|-------------------------|---------|------------------|------------------|----------------------|---------------------------------|---------------|------------------------------|-------------------------------------------------------------|-------------------------------|------------------------------------|-----------------------------------|----------------------------------------------|---------------------------------------------|--------------------------------|
| C-1                     | 4+3     | 161              | 80               | 84                   | 4.33                            | N             | Y                            | Flutamide plus Lupron                                       | 1.91                          | 4.2                                | 80                                | 0.0                                          | 4.3                                         | N                              |
| C-2                     | 9       | NA               | 77               | 84                   | 6.93                            | N             | Y                            | B orchiectomy followed by Flutamide plus Lupron             | 5.84                          | 2.9                                | 81                                | 4.0                                          | 2.9                                         | N                              |
| C-3                     | 3+5     | 11.5             | 66               | 70                   | 4.48                            | N             | Y                            | Casodex plus Zoladex                                        | 1.11                          | 4.0                                | 70                                | 4.1                                          | 0.4                                         | N                              |
| C-4                     | UNK     | 403.5            | 63               | 65                   | 1.72                            | N             | Y                            | Lupron, Finasteride, Flutamide                              | 0.68                          | 1.5                                | 63                                | 0.0                                          | 1.7                                         | N                              |
| C-5                     | 4+5     | 245              | 43               | 47                   | 3.97                            | Y             | Y                            | Lupron                                                      | 1.05                          | 4.0                                | 46                                | 3.5                                          | 0.5                                         | 6.05                           |
| C-6                     | UNK     | UNK              | 53               | 63                   | 9.44                            | Y             | Y                            | Lupron, Casodex                                             | 6.33                          | 8.2                                | 59                                | 5.9                                          | 3.5                                         | 10.06                          |
| C-7                     | 4+3     | 10               | 74               | 86                   | 11.76                           | N             | Y                            | Casodex                                                     | 9.97                          | 11.4                               | 84                                | 10.1                                         | 1.7                                         | 11.28                          |
| C-8                     | 3+4     | UNK              | 73               | 83                   | 10.49                           | Y             | Y                            | Casodex plus Lupron                                         | 9.24                          | 6.6                                | 83                                | 9.7                                          | 0.8                                         | N                              |
| C-9                     | 3+3     | 10               | 64               | 72                   | 8.05                            | Y             | Y                            | Lupron/Casodex                                              | 6.80                          | 4.7                                | N/A                               | N/A                                          | N/A                                         | 1.91                           |
| C-10                    | 5+4     | 268              | 54               | 71                   | 16.37                           | N             | Y                            | Orchiectomy, Flutamide, Casodex                             | 4.86                          | 15.4                               | 63                                | 8.5                                          | 7.9                                         | 3.88                           |
| C-11                    | 3+4     | 3.3              | 65               | 76                   | 11.39                           | N             | Y                            | Casodex/Lupron                                              | 3.07                          | 8.9                                | 74                                | 9.0                                          | 2.4                                         | 2.76                           |
| C-12                    | 4+5     | 11.3             | 71               | 77                   | 6.32                            | Y             | Y                            | Casodex, Lupron, Dutasteride, Nilutamide, Abiraterone       | 2.33                          | 5.9                                | 73                                | 2.4                                          | 3.9                                         | 3.42                           |
| C-13                    | UNK     | 50               | 59               | 61                   | 1.56                            | N             | Y                            | Zoladex, Casodex, Abiraterone                               | UNK                           | 1.4                                | 60                                | 0.2                                          | 1.4                                         | N                              |
| C-14                    | 4+5     | 105              | 43               | 45                   | 1.35                            | N             | Y                            | Lupron, Casodex, Abiraterone, Enzalutamide                  | 0.65                          | 1.3                                | 43                                | 0.0                                          | 1.3                                         | N                              |
| C-15                    | 3+3     | <10              | 70               | 82                   | 11.58                           | N             | Y                            | Vantas implants, Lupron, Casodex, Abiraterone, Enzalutamide | 8.93                          | 7.0                                | 79                                | 9.0                                          | 2.2                                         | N                              |

Abbreviations: N = no; UNK = unknown; N = no; N/A = not applicable

**Supplementary Table 3, cont'd: Clinical Data for Rapid Autopsy Subjects**

| Rapid Autopsy Subject # | Duration Ketoconazole (months) | Duration DES/estrogen (months) | DES+Ketoconazole | Duration Corticosteroid (months) | Duration Taxotere (months) | Duration Taxol (months) | Duration Carboplatin (months) | Duration Estramustine (month) | Duration Mitoxantrone (months) | Duration Abiraterone (months) | Duration Enzalutamide (months) | Bisphosphonates        | Duration Bisphosphonates (months) | Vaccine | Type of Vaccine | Final Serum PSA (ng/mL) |
|-------------------------|--------------------------------|--------------------------------|------------------|----------------------------------|----------------------------|-------------------------|-------------------------------|-------------------------------|--------------------------------|-------------------------------|--------------------------------|------------------------|-----------------------------------|---------|-----------------|-------------------------|
| C-1                     | N                              | N                              | N                | 4.54                             | N                          | N                       | N                             | N                             | 4.54                           | N                             | N                              | Pamidronate            | 12.59                             | N       |                 | 128.70                  |
| C-2                     | N                              | N                              | N                | N                                | N                          | N                       | N                             | N                             | N                              | N                             | N                              | Zometa                 | 6.21                              | N       |                 | 2038.90                 |
| C-3                     | N                              | 5.65                           | N                | N                                | 3.78                       | 3.42                    | 3.42                          | 3.78                          | N                              | N                             | N                              | Pamidronate            | 22.09                             | N       |                 | 325.00                  |
| C-4                     | N                              | N                              | N                | 6.90                             | UNK                        | N                       | N                             | N                             | 6.90                           | N                             | N                              | Pamidronate            | 8.68                              | N       |                 | 396.00                  |
| C-5                     | 6.05                           | 2.24                           | Y                | 6.28                             | N                          | N                       | N                             | N                             | N                              | N                             | N                              | N                      | N                                 | N       |                 | 201.70                  |
| C-6                     | 10.06                          | 3.52                           | Y                | 5.75                             | 9.57                       | 2.79                    | 2.79                          | N                             | 3.78                           | N                             | N                              | Alendronate/<br>Zometa | 23.44                             | N       |                 | 3919.00                 |
| C-7                     | 11.28                          | N                              | N                | N                                | N                          | N                       | N                             | N                             | N                              | N                             | N                              | N                      | N                                 | Y       | GVAX            | 1508.40                 |
| C-8                     | N                              | 3.94                           | N                | N                                | N                          | 10.91                   | 10.91                         | N                             | N                              | N                             | N                              | Zometa                 | 7.50                              | N       |                 | 114.83                  |
| C-9                     | 1.91                           | N                              | N                | N                                | N                          | N                       | N                             | N                             | N                              | N                             | N                              | N                      | N                                 | N       |                 | 298.70                  |
| C-10                    | 3.88                           | 13.77                          | N                | 36.26                            | 10.36                      | N                       | N                             | N                             | N                              | N                             | N                              | Zometa                 | 63.12                             | Y       | GVAX            | 735.97                  |
| C-11                    | 2.76                           | 7.00                           | N                | 54.80                            | 38.17                      | 13.77                   | 13.77                         | N                             | 5.52                           | N                             | N                              | Zometa                 | 96.19                             | N       |                 | 5690.80                 |
| C-12                    | 3.42                           | N                              | N                | 29.91                            | 8.38                       | N                       | 6.25                          | N                             | N                              | 2.76                          | N                              | N                      | N                                 | N       |                 | 1181.75                 |
| C-13                    | N                              | N                              | N                | UNK                              | UNK                        | N                       | N                             | N                             | N                              | 3.98                          | N                              | Pamidronate            | UNK                               | N       |                 | 30.60                   |
| C-14                    | N                              | N                              | N                | 7.89                             | 2.93                       | N                       | N                             | N                             | N                              | 2.99                          | 1.35                           | N                      | N                                 | N       |                 | 1949.44                 |
| C-15                    | N                              | N                              | N                | 6.21                             | 6.67                       | N                       | N                             | N                             | N                              | 2.53                          | 4.01                           | Zomata                 | 22.52                             | Y       | PROVENGE        | 1158.53                 |

Abbreviations: N = no; UNK = unknown; N = no; N/A = not applicable



**Supplementary Table 4: AR Coverage and Copy Number**

| <b>Tumor ID</b> | <b>Tumor Type</b> | <b>Mean Per-Base Read Coverage of AR</b> | <b>AR Copy Number</b> | <b>AR bases with zero coverage</b> | <b>AR bases with coverage</b> |
|-----------------|-------------------|------------------------------------------|-----------------------|------------------------------------|-------------------------------|
| C-1A            | met               | 702                                      | 1                     | 29584                              | 157004                        |
| C-1B            | met               | 556                                      | 1                     | 26532                              | 160056                        |
| C-2A            | met               | 283                                      | 1                     | 23892                              | 162696                        |
| C-2B            | met               | 419                                      | 1                     | 30043                              | 156545                        |
| C-3A            | met               | 1135                                     | 4                     | 27066                              | 159522                        |
| C-3B            | met               | 1087                                     | 4                     | 27433                              | 159155                        |
| C-4A            | met               | 949                                      | 4                     | 27859                              | 158729                        |
| C-4B            | met               | 867                                      | 4                     | 23899                              | 162689                        |
| C-5A            | met               | 426                                      | 1                     | 29277                              | 157311                        |
| C-5B            | met               | 488                                      | 1                     | 30307                              | 156281                        |
| C-6A            | met               | 456                                      | 1                     | 30179                              | 156409                        |
| C-6B            | met               | 427                                      | 1                     | 29962                              | 156626                        |
| C-7A            | met               | 1134                                     | 5                     | 26186                              | 160402                        |
| C-7B            | met               | 874                                      | 4                     | 30253                              | 156335                        |
| C-8A            | met               | 553                                      | 1                     | 29035                              | 157553                        |
| C-8B            | met               | 448                                      | 1                     | 27761                              | 158827                        |
| C-9A            | met               | 382                                      | 1                     | 26069                              | 160519                        |
| C-9B            | met               | 528                                      | 1                     | 29054                              | 157534                        |
| C-10A           | met               | 587                                      | 1                     | 28566                              | 158022                        |
| C-10B           | met               | 583                                      | 1                     | 30049                              | 156539                        |
| C-11A           | met               | 714                                      | 2                     | 29043                              | 157545                        |
| C-11B           | met               | 466                                      | 1                     | 29710                              | 156878                        |
| C-12A           | met               | 732                                      | 2                     | 29848                              | 156740                        |
| C-12B           | met               | 849                                      | 3                     | 26242                              | 160346                        |
| C-13A           | met               | 313                                      | 1                     | 27651                              | 158937                        |
| C-13B           | met               | 469                                      | 1                     | 27916                              | 158672                        |
| C-14A           | met               | 981                                      | 4                     | 27411                              | 159177                        |
| C-14B           | met               | 1293                                     | 9                     | 27110                              | 159478                        |
| C-15A           | met               | 543                                      | 1                     | 28929                              | 157659                        |
| C-15B           | met               | 531                                      | 2                     | 30460                              | 156128                        |

**Supplementary Table 4, cont'd: AR Coverage and Copy Number**

|      |               |     |   |       |        |
|------|---------------|-----|---|-------|--------|
| P-1  | TURP          | 927 | 2 | 27323 | 159265 |
| P-3  | TURP          | 743 | 1 | 27732 | 158856 |
| P-14 | TURP          | 993 | 2 | 26364 | 160224 |
| P-17 | TURP          | 789 | 1 | 26852 | 159736 |
| P-18 | TURP          | 553 | 1 | 25549 | 161039 |
| P-25 | TURP          | 419 | 1 | 29005 | 157583 |
| P-2  | prostatectomy | 418 | 1 | 28329 | 158259 |
| P-4  | prostatectomy | 389 | 1 | 26825 | 159763 |
| P-5  | prostatectomy | 419 | 1 | 28472 | 158116 |
| P-6  | prostatectomy | 207 | 1 | 25267 | 161321 |
| P-7  | prostatectomy | 419 | 1 | 28494 | 158094 |
| P-8  | prostatectomy | 382 | 1 | 29434 | 157154 |
| P-9  | prostatectomy | 344 | 1 | 28462 | 158126 |
| P-10 | prostatectomy | 363 | 1 | 29747 | 156841 |
| P-11 | prostatectomy | 392 | 1 | 29499 | 157089 |
| P-12 | prostatectomy | 304 | 1 | 31210 | 155378 |
| P-13 | prostatectomy | 377 | 1 | 31221 | 155367 |
| P-15 | prostatectomy | 396 | 1 | 30248 | 156340 |
| P-16 | prostatectomy | 438 | 1 | 28743 | 157845 |
| P-19 | prostatectomy | 426 | 1 | 27374 | 159214 |
| P-20 | prostatectomy | 454 | 1 | 30281 | 156307 |
| P-21 | prostatectomy | 351 | 1 | 30123 | 156465 |
| P-22 | prostatectomy | 351 | 1 | 27060 | 159528 |
| P-23 | prostatectomy | 420 | 1 | 31253 | 155335 |
| P-24 | prostatectomy | 371 | 1 | 30225 | 156363 |
| P-26 | prostatectomy | 345 | 1 | 27664 | 158924 |
| P-27 | prostatectomy | 357 | 1 | 29139 | 157449 |

Abbreviations: met = metastasis; TURP = transurethral resection of the prostate

**Supplementary Table 5: AR Coding Single Nucleotide Variants**

| <b>Tumor ID</b> | <b>chromosome position</b> | <b>wild-type base</b> | <b>variant base</b> | <b>AR amino acid position</b> | <b>wild-type amino acid</b> | <b>variant amino acid</b> | <b>reads with wild-type base</b> | <b>reads with variant base</b> | <b>variant allele %</b> |
|-----------------|----------------------------|-----------------------|---------------------|-------------------------------|-----------------------------|---------------------------|----------------------------------|--------------------------------|-------------------------|
| C-1A            | chrX: 66,943,552           | A                     | G                   | 878                           | T                           | A                         | 597                              | 720                            | 54.67%                  |
| C-1B            | chrX: 66,943,552           | A                     | G                   | 878                           | T                           | A                         | 123                              | 702                            | 85.09%                  |
| C-8A            | chrX: 66,931,463           | T                     | A                   | 702                           | L                           | H                         | 579                              | 354                            | 37.86%                  |
| C-8B            | chrX: 66,931,463           | T                     | A                   | 702                           | L                           | H                         | 487                              | 311                            | 38.97%                  |
| C-10A           | chrX: 66,943,552           | A                     | G                   | 878                           | T                           | A                         | 211                              | 845                            | 79.94%                  |
| C-10B           | chrX: 66,943,552           | A                     | G                   | 878                           | T                           | A                         | 298                              | 716                            | 70.54%                  |

**Supplementary Table 6: Clinical Data for TURP and Prostatectomy Specimens**

| Patient | Specimen      | Year | Age at Diagnosis | Age at Surgery | Race             | Gleason Score | PSA  | prior ADT | CRPC | metastases | current therapy | prior therapies                                  |
|---------|---------------|------|------------------|----------------|------------------|---------------|------|-----------|------|------------|-----------------|--------------------------------------------------|
| P-1     | TURP          | 2013 | 53               | 58             | Caucasian        | 4+5=9         | 9.6  | yes       | yes  | yes        | docetaxel       | bicalutamide, lupron, RT                         |
| P-3     | TURP          | 2013 | 64               | 72             | Caucasian        | 4+5=9         | 5.9  | yes       | yes  | yes        | degarelix       | lupron, bicalutamide                             |
| P-14    | TURP          | 2014 | 49               | 55             | Caucasian        | 5+5=10        | 16.3 | yes       | yes  | yes        | docetaxel       | lupron, bicalutamide, enzalutamide, RT, provenge |
| P-17    | TURP          | 2014 | 64               | 73             | Caucasian        | 5+5=10        | 5.9  | yes       | yes  | yes        | docetaxel       | lupron, bicalutamide, tamoxifen, avodart         |
| P-18    | TURP          | 2015 | 63               | 67             | hispanic         | 4+5=9         | 8.9  | yes       | yes  | no         | lupron          | bicalutamide, lupron                             |
| P-25    | TURP          | 2015 | 66               | 71             | African American | 4+4=8         | 4.6  | yes       | yes  | no         | lupron          | bicalutamide, lupron                             |
| P-2     | prostatectomy | 2013 | 64               | 64             | Indian           | 7             | 10.3 | no        | no   | no         | none            | none                                             |
| P-4     | prostatectomy | 2013 | 56               | 57             | Caucasian        | 6             | 5.7  | no        | no   | no         | none            | none                                             |
| P-5     | prostatectomy | 2013 | 58               | 58             | African American | 9             | 4.6  | no        | no   | no         | none            | none                                             |
| P-6     | prostatectomy | 2013 | 66               | 66             | Caucasian        | 8             | 8.9  | no        | no   | no         | none            | none                                             |
| P-7     | prostatectomy | 2013 | 61               | 61             | Caucasian        | 7             | 8.6  | no        | no   | no         | none            | none                                             |
| P-8     | prostatectomy | 2013 | 66               | 67             | hispanic         | 7             | 11.6 | no        | no   | no         | none            | none                                             |
| P-9     | prostatectomy | 2014 | 63               | 63             | Caucasian        | 7             | 4.4  | no        | no   | no         | none            | none                                             |
| P-10    | prostatectomy | 2014 | 62               | 62             | African American | 8             | 3    | no        | no   | no         | none            | none                                             |
| P-11    | prostatectomy | 2014 | 54               | 54             | Caucasian        | 7             | 8.9  | no        | no   | no         | none            | none                                             |
| P-12    | prostatectomy | 2014 | 55               | 55             | Caucasian        | 7             | 9.6  | no        | no   | no         | none            | none                                             |
| P-13    | prostatectomy | 2014 | 59               | 59             | African American | 9             | 14.3 | no        | no   | no         | none            | none                                             |
| P-15    | prostatectomy | 2014 | 58               | 61             | hispanic         | 6             | 14.6 | no        | no   | no         | none            | none                                             |
| P-16    | prostatectomy | 2014 | 62               | 62             | Caucasian        | 8             | 17   | no        | no   | no         | none            | none                                             |
| P-19    | prostatectomy | 2015 | 64               | 64             | African American | 7             | 12   | no        | no   | no         | none            | none                                             |
| P-20    | prostatectomy | 2015 | 65               | 65             | hispanic         | 8             | 8.3  | no        | no   | no         | none            | none                                             |
| P-21    | prostatectomy | 2015 | 62               | 63             | Caucasian        | 8             | 4.6  | no        | no   | no         | none            | none                                             |
| P-22    | prostatectomy | 2015 | 58               | 58             | African American | 7             | 5.9  | no        | no   | no         | none            | none                                             |
| P-23    | prostatectomy | 2015 | 53               | 53             | hispanic         | 7             | 6.8  | no        | no   | no         | none            | none                                             |
| P-24    | prostatectomy | 2015 | 57               | 58             | Caucasian        | 8             | 5.6  | no        | no   | no         | none            | none                                             |
| P-26    | prostatectomy | 2015 | 59               | 59             | Caucasian        | 8             | 4.2  | no        | no   | no         | none            | none                                             |
| P-27    | prostatectomy | 2015 | 61               | 63             | hispanic         | 7             | 11.6 | no        | no   | no         | none            | none                                             |

Abbreviations: ADT, androgen deprivation therapy; CRPC, castration-resistant prostate cancer; PSA, prostate specific antigen;

RT, radiation therapy; TURP = transurethral resection of the prostate

**Supplementary Table 7: Oligonucleotide Primers for AR-GSR Validation**

| Tumor ID | AR Rearrangement             | Orientation | Primer sequence        | Genomic coordinates of primer binding site |                |
|----------|------------------------------|-------------|------------------------|--------------------------------------------|----------------|
| C-4A     | Deletion 1                   | F           | ACGCAAAGCACAGGACTAGT   | ChrX:66803819                              | ChrX:66803838  |
|          |                              | R           | TCAAGTGAGAGTCTGCAGC    | ChrX:66816619                              | ChrX:66816600  |
|          | Deletion 2                   | F           | CACACAAGCTAAATGTCCTTGC | ChrX:66754887                              | ChrX:66754908  |
|          |                              | R           | AGTACTGCTTTAGCTTGGCTGT | ChrX:66843323                              | ChrX:66843344  |
| C-6A     | Deletion 1                   | F           | AGGCTACTTCAGAGATTGGGC  | ChrX:66934661                              | ChrX:66934681  |
|          |                              | R           | CCCCACAGGGAACCATCTAC   | ChrX:66942571                              | ChrX:66942552  |
|          | Deletion 2                   | F           | ACTGAACTTCTATGTGCCGC   | ChrX:66939869                              | ChrX:66939888  |
|          |                              | R           | TCCCAGAAAGGATCTTGGGC   | ChrX:66943651                              | ChrX:66943632  |
|          | Duplication                  | F           | GGTGGGGGTCAAGTCTGTG    | ChrX:66942571                              | ChrX:66942589  |
|          |                              | R           | GCTTGGTGTGAAGAGATCAGC  | ChrX:66939766                              | ChrX:66939745  |
| C-6B     | SAME AS C-6A                 |             | SAME AS C-6A           |                                            |                |
| C-6C     | SAME AS C-6A                 |             | SAME AS C-6A           |                                            |                |
| C-7A     | Deletion                     | F           | GCAAAACCCACACAAGGAT    | ChrX:49150490                              | ChrX:49150509  |
|          |                              | R           | AGGGACGGAGGTAGCATCTT   | ChrX:66779338                              | ChrX:66779319  |
| C-7B     | SAME AS C-7A                 |             | SAME AS C-7A           |                                            |                |
| C-9A     | Translocation                | F           | ATTGTCTGTCCCTGCTCCC    | ChrX:66909044                              | ChrX:66909063  |
|          |                              | R           | ACCCTGGGAAAGAGGAAGA    | Chr11:79397819                             | Chr11:79397800 |
| C-12A    | Deletion                     | F           | CAGCAACTTGTGAAACGCCA   | ChrX:66786193                              | ChrX:66786212  |
|          |                              | R           | TCCGCCAGATTCCATTCCAC   | ChrX:66862447                              | ChrX:66862428  |
|          | Duplication 1                | F           | GCAACTCCTCAGCAACAGC    | ChrX:66765561                              | ChrX:66765580  |
|          |                              | R           | TGACCAAGAACCCAAAAGCA   | ChrX:66738794                              | ChrX:66738813  |
|          | Duplication 2                | F           | TGGTGTGGTCCCTGTTGAT    | ChrX:66909885                              | ChrX:66909904  |
|          |                              | R           | ACAAGTCCAGGACCAGACAG   | ChrX:66531140                              | ChrX:66531140  |
| C-12B    | Deletion                     |             | SAME AS C-12A          |                                            |                |
|          | Duplication1                 |             | SAME AS C-12A          |                                            |                |
|          | Duplication3                 | F           | AGATCCACAGCCCCCTACTT   | ChrX:66767390                              | ChrX:66767409  |
| C-14A    | Inversion 1 Right breakpoint | R           | TGGAATGGGGATTGCCAGAG   | ChrX:66026233                              | ChrX:66026214  |
|          |                              | F           | TCAGCCTGAAGGACTCTCTTC  | ChrX:65828536                              | ChrX:65828516  |
|          | Inversion 2 Left breakpoint  | R           | TCAAGTGAGAGTCTGCAGC    | ChrX:66816619                              | ChrX:66816600  |
|          |                              | F           | CCCCAGGGCTGAAAAGTTAGT  | ChrX:66919865                              | ChrX:66919885  |
| C-14B    | Inversion 3 Right breakpoint | R           | GGAGTAGTGACGCTAGGCAA   | ChrX:67011945                              | ChrX:67011964  |
|          |                              | F           | TCGGTGAAGCCACAATTCCA   | ChrX:66908965                              | ChrX:66908946  |
|          | Duplication                  | R           | GCCCTGAGTGCAAGATGACT   | ChrX:66922440                              | ChrX:66922421  |
|          |                              | F           | CCAACAAGCCCCAGTGAGAT   | ChrX:66929502                              | ChrX:66929521  |
|          |                              | R           | ATCATCCCTGCCTCCCTTCT   | ChrX:66921806                              | ChrX:66921787  |

**Supplementary Table 8:** Oligonucleotide Primers for RT-PCR

| Target   | Detail       | Sequence                                  |
|----------|--------------|-------------------------------------------|
| AR-V7    | F Primer     | 5'- TGT CGT CTT CGG<br>AAA TGT TAT GA -3' |
|          | R Primer     | 5'- TCA TTT TGA GAT<br>GCT TGC AAT TG -3' |
|          | TaqMan Probe | 6FAM-TCT GGG AGA AAA ATT -<br>MGBNFQ      |
| ARv567es | F Primer     | 5'- CCTTGCTCTCTAGCCTCAATGAA -3'           |
|          | R Primer     | 5'- CTTGATTAGCAGGTCAAAAGTGA ACT -3'       |
|          | TaqMan Probe | 6FAM-CCT TGC CTG ATT GCG AGA -MGBNFQ      |



**Supplementary Table 9: Oligonucleotides for AR-V Construction**

| AR-V                    | Detail            | Sequence                                                                                                                                    |
|-------------------------|-------------------|---------------------------------------------------------------------------------------------------------------------------------------------|
| 1/2/3/4a-<br>ups/5a-ups | cassette F strand | 5'-<br>ctagGAGTGAGGAGAGGAAGAGAAAGAATTGGAAGAAGAGAGATCAGTGCAGTTTTTCATGGGGAATGCTTTCAATTTTTCTCATTTCAGTATG<br>ATGTTGGTGGTTGGATTGCCATAGt          |
|                         | cassette R strand | 5'-<br>ctagaCTATGGCAATCCAACCACCAACATCATACTGAATGAGGAAAAATTGAAAGCATTCCCCATGAAAAGTGCAGTCTCTCTTCTTCCAATT<br>CTTTCTTCTCTCCTCACTC                 |
| 1/2/3/4a-<br>ups/5b-ups | cassette F strand | 5'-ctagGAGTGAGGAGAGGAAGAGAAAGAATTGGAAGAAGAGAGATCAGTGCAGGGTGat                                                                               |
|                         | cassette R strand | 5'-ctagaTCACCCTGCACTGATCTCTTCTTCCAATTTCTTCTCTCCTCCTCACTC                                                                                    |
| 1/2/3/4a-<br>ups/5c-ups | cassette F strand | 5'ctagGAGTGAGGAGAGGAAGAGAAAGAATTGGAAGAAGAGAGATCAGTGCAGGCCACATTCCAGGGATCTACACATGTCTATGGAAAATTT<br>CTCTCGTCTTGGCAGAGCCAGTCATGAGAAGAGAACATGat  |
|                         | cassette R strand | 5'-<br>ctagaTCATGTTCTTCTCTCATGACTGGCTCTGCCAAGACGAGAGAAATTTCCATAGACATGTGTAGATCCCTGGAATGTGGCCTGCACTGAT<br>CTCTCTTCTTCCAATTTCTTCTCTCCTCCTCACTC |
| 1/2/3/4-<br>chr11       | cassette F strand | 5'-ctagGAGTTGAAAAACGAAGGCTCAGAGACCCTGGATCACCCAGTGat                                                                                         |
|                         | cassette R strand | 5'-ctagaTCACTGGGTGATCCAGGGTCTCTGAGCCTTCGTTTTTCCAACTC                                                                                        |
